# Supplementary material
Source: publisher site journal article supplement (https://www.dovepress.com/article/285293)
Supplement: Supplementary file 1 [file get_supplementary_file.php]

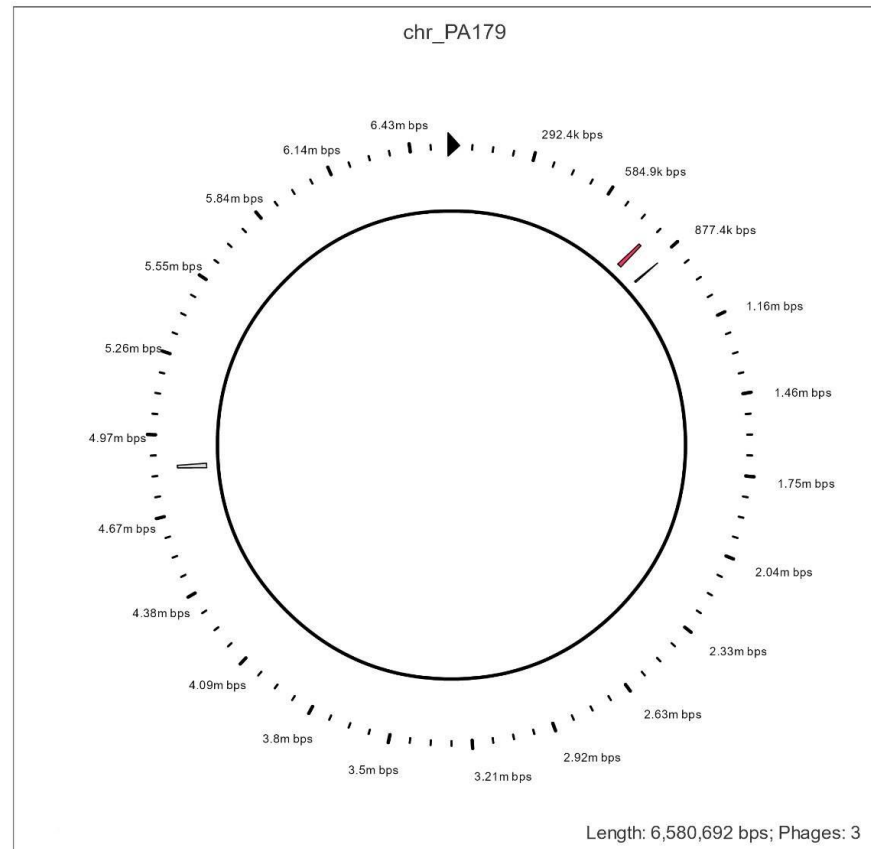

**Prophage types**

- |                                                                                                     |                                                                                                           |                                                                                                             |
|-----------------------------------------------------------------------------------------------------|-----------------------------------------------------------------------------------------------------------|-------------------------------------------------------------------------------------------------------------|
|  intact prophage |  incomplete prophage |  questionable prophage |
|-----------------------------------------------------------------------------------------------------|-----------------------------------------------------------------------------------------------------------|-------------------------------------------------------------------------------------------------------------|

**BLAST identified phage elements**

- |                                                                                                          |                                                                                                 |                                                                                                                |
|----------------------------------------------------------------------------------------------------------|-------------------------------------------------------------------------------------------------|----------------------------------------------------------------------------------------------------------------|
|  Lysis                |  Terminase |  Portal                   |
|  Protease             |  Coat      |  Tail shaft               |
|  Attachment site      |  Integrase |  Other phage-like protein |
|  Hypothetical protein |  Other     |  Transposase              |
|  Tail fiber           |  Plate     |  tRNA                     |

Supplementary Figure 1 prophage types visualization

**Prophage region:** 1  
**Number of CDS:** 25  
**Location:** from 777791 to 796266 (18476 bps)  
**Predicted status:** intact prophage  
**GC content:** 65.25%

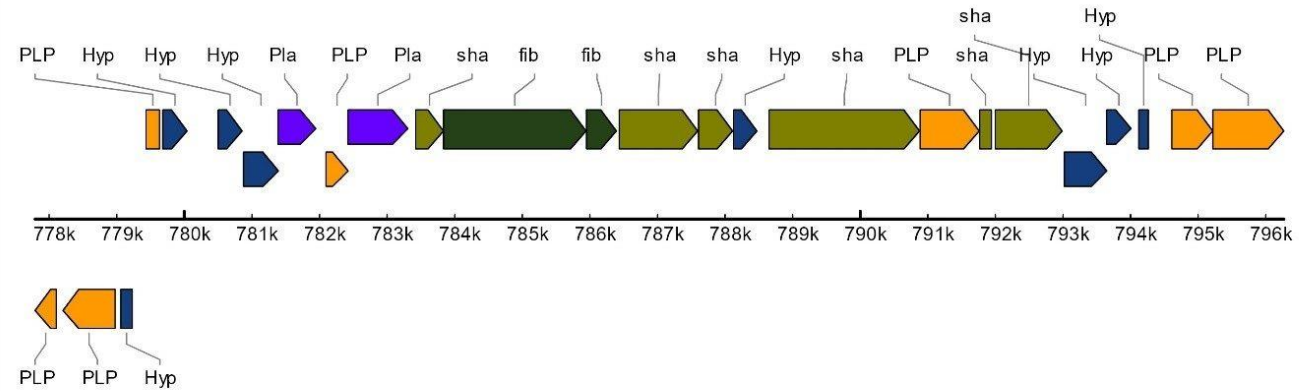

**Identified CDS types:**

|                                                                                     |    |                      |                                                                                       |    |           |                                                                                       |    |                          |
|-------------------------------------------------------------------------------------|----|----------------------|---------------------------------------------------------------------------------------|----|-----------|---------------------------------------------------------------------------------------|----|--------------------------|
|  | 1  | Lysis                |  | 2  | Terminase |  | 3  | Portal                   |
|  | 4  | Protease             |  | 5  | Coat      |  | 6  | Tail shaft               |
|  | 7  | Attachment site      |  | 8  | Integrase |  | 9  | Other phage-like protein |
|  | 10 | Hypothetical protein |  | 11 | Other     |  | 12 | Transposase              |
|  | 13 | Tail fiber           |  | 14 | Plate     |  | 15 | tRNA                     |

**Supplementary Figure 2** Identified CDS types, prophage region 1

**Prophage region:** 2  
**Number of CDS:** 10  
**Location:** from 881055 to 887689 (6635 bps)  
**Predicted status:** questionable prophage  
**GC content:** 62.47%

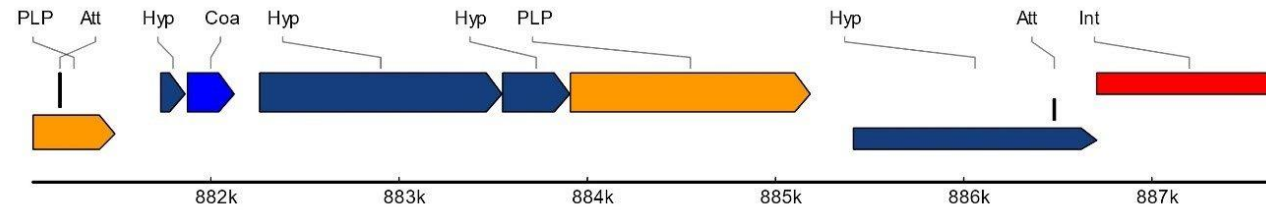

**Identified CDS types:**



**Supplementary Figure 3** Identified CDS types, prophage region 2

**Prophage region:** 3  
**Number of CDS:** 22  
**Location:** from 4838787 to 4858196 (19410 bps)  
**Predicted status:** incomplete prophage  
**GC content:** 64.49%

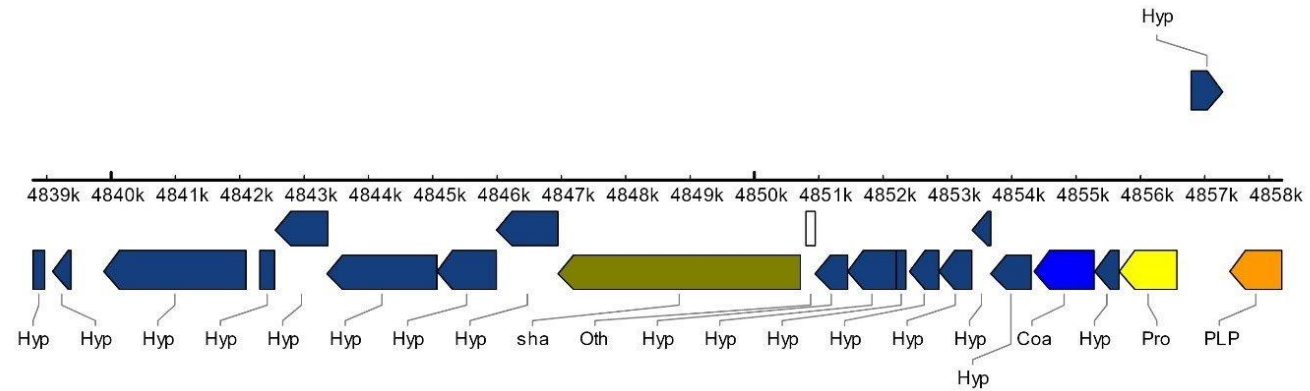

**Identified CDS types:**

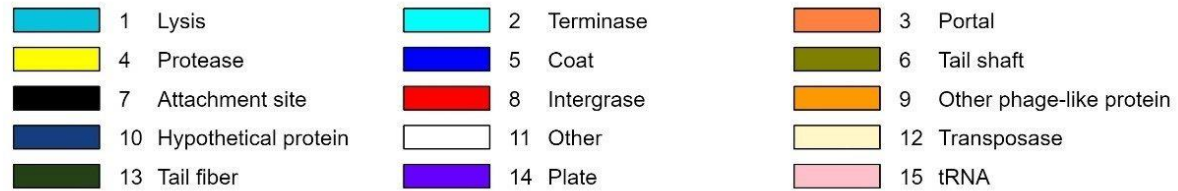

**Supplementary Figure 4** Identified CDS types, prophage region 3
